# Supplementary material for: Photocatalytic activity of nanohybrid Co-TCPP@TiO2/WO3 in aerobic oxidation of alcohols under visible light
Source: Royal Society of Chemistry journal article supplement (doi:10.1039/c5ta09357k), 2016-01-01
Supplement: c5ta09357k1.pdf [file c5ta09357k1.pdf]

**Photocatalytic activity of nanohybrid Co-TCPP@TiO<sub>2</sub>/WO<sub>3</sub> in aerobic  
oxidation of alcohols under visible light**

Elham Safaei, Sajjad Mohebbi\*

Department of Chemistry, University of Kurdistan, P.O. Box 66175-416, Sanandaj, Kurdistan  
6617914335, Iran

E-mail addresses: [smohebbi@uok.ac.ir](mailto:smohebbi@uok.ac.ir), [sajadmohebi@yahoo.com](mailto:sajadmohebi@yahoo.com)

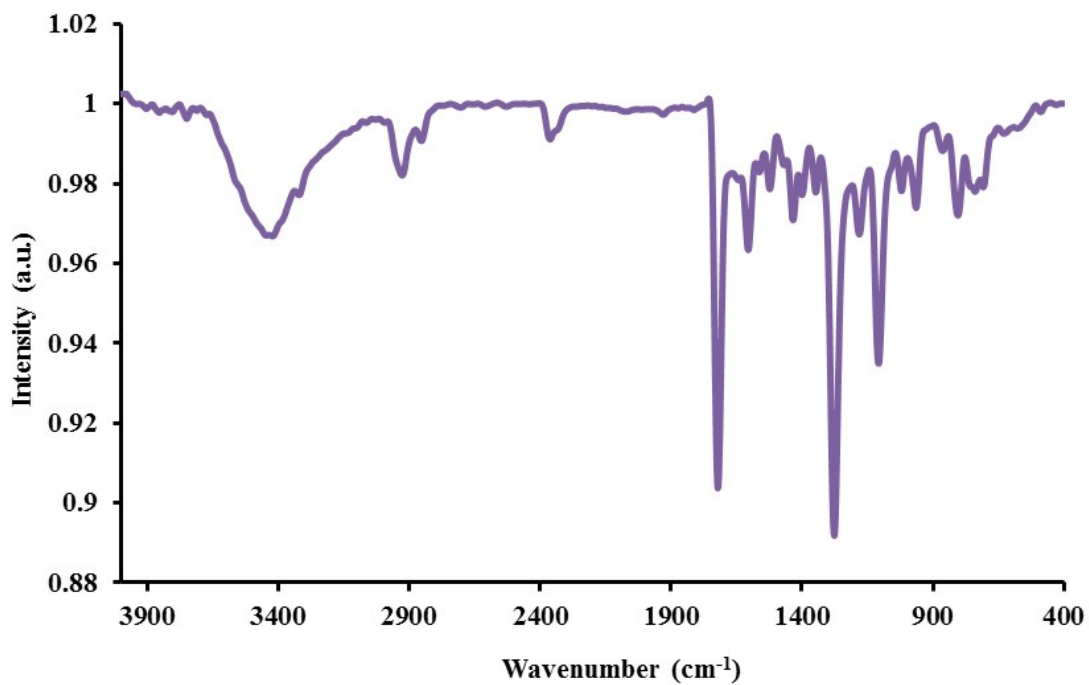

**Figure S1.** FT IR (KBr) spectram of meso-tetra (4-methoxyphenyl) porphyrin ( H<sub>2</sub>TCPP)

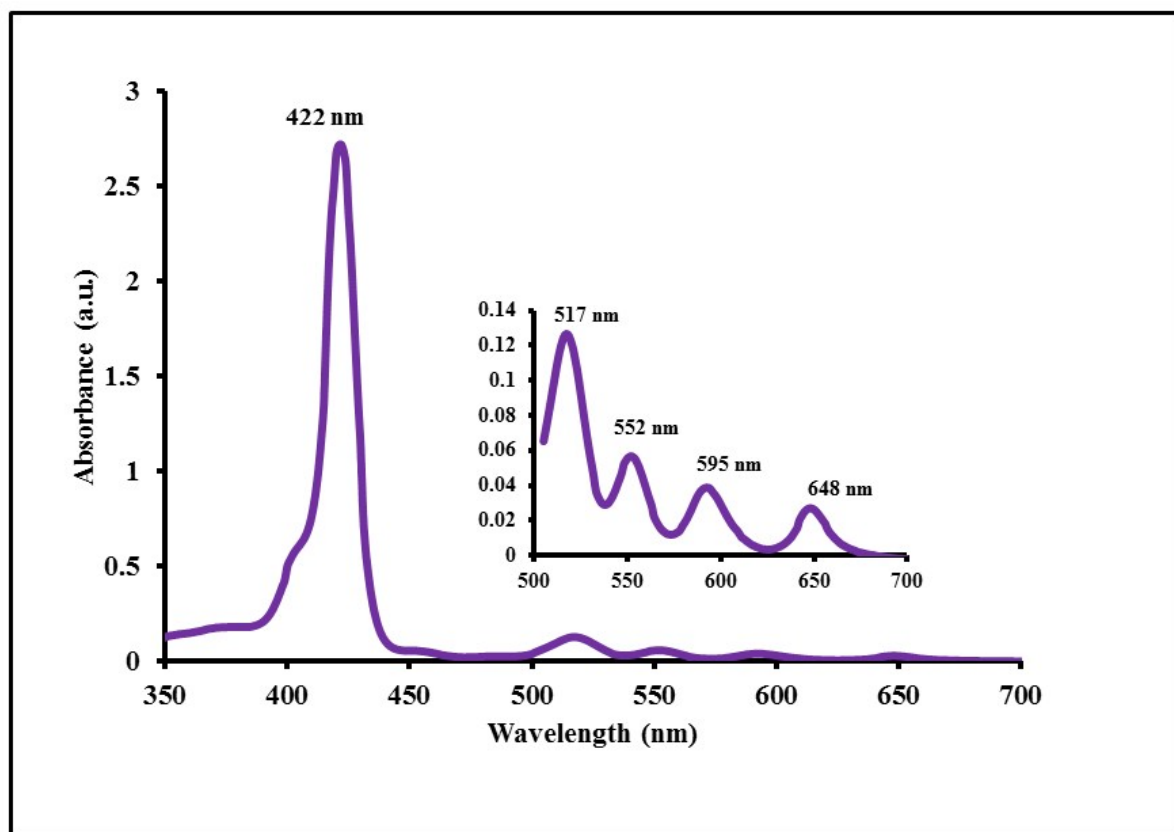

**Figure S2.** UV-Vis spectra (CH<sub>3</sub>Cl) of of meso-tetra (4-metoxyphenyl) porphyrin ( H<sub>2</sub>TCPP)

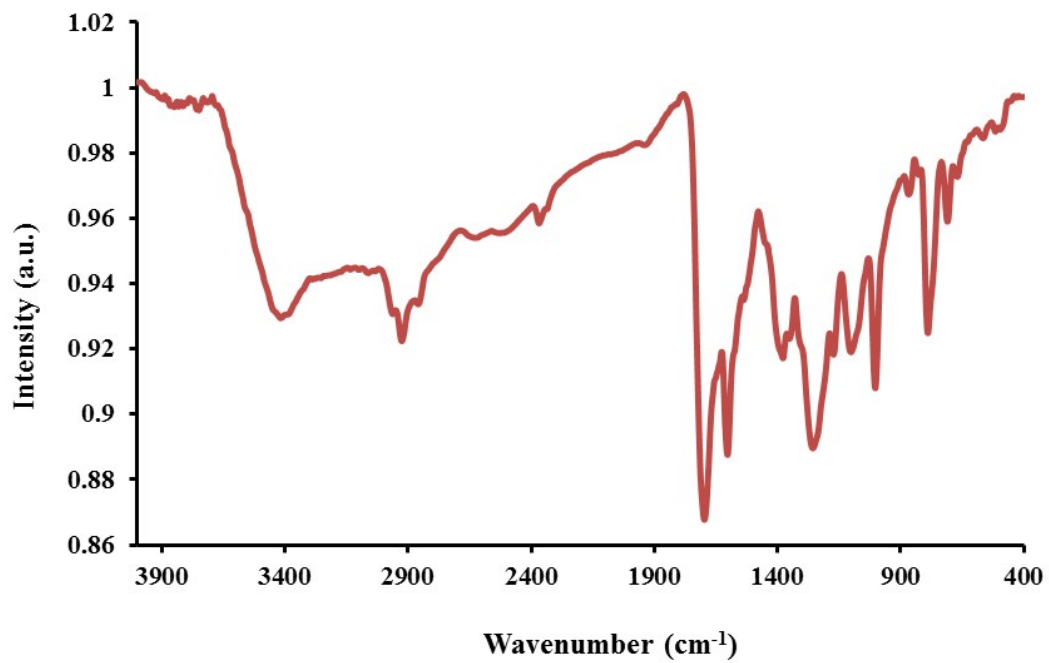

**Figure S3.** FT IR spectram (KBr) of Cobalt(II) meso-tetra (4-carboxyphenyl) porphyrin (Co-TCPP)

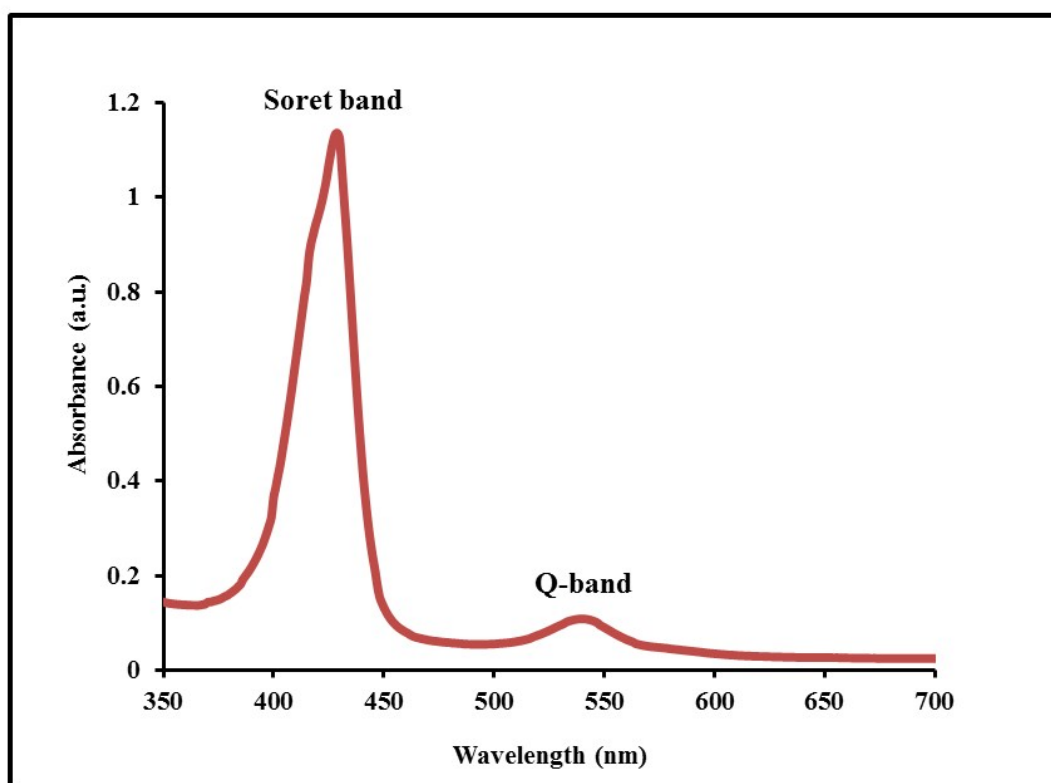

**Figure S4.** UV-Vis spectra (THF) of of Cobalt(II) meso-tetra (4-carboxyphenyl) porphyrin (Co-TCPP)
